# Supplementary material
Source: HighWire-hosted journal article supplement (https://tobaccocontrol.bmj.com/highwire/filestream/169035/field_highwire_adjunct_files/1/tc-2024-058718supp002_data_supplement.pdf)
Supplement: tc-2024-058718supp002_data_supplement.pdf [file tc-2024-058718supp002_data_supplement.pdf]

Supplement B. Evidence Table of Vape Shop Exclusive Records Assessing Neighborhood-Level Inequities, N=6

| Author (Year), ID        | Study Design    | Study Location                                                                                                                                                                                                                                                              | Unit of Analysis (N)    | Statistical Approach                                               | Data Source (Year): Area-Level Sociodemographic Variable                                                              | Data Source (Year): Tobacco Retailers                                                                                                                                                                                        | Number and Type of Tobacco Retailers Included                                      | Area-Level Outcome Variable Operationalization   | Unadjusted Effect Sizes                                                                                                                                                                                                                                                    | Risk of Bias                                                                                         |
|--------------------------|-----------------|-----------------------------------------------------------------------------------------------------------------------------------------------------------------------------------------------------------------------------------------------------------------------------|-------------------------|--------------------------------------------------------------------|-----------------------------------------------------------------------------------------------------------------------|------------------------------------------------------------------------------------------------------------------------------------------------------------------------------------------------------------------------------|------------------------------------------------------------------------------------|--------------------------------------------------|----------------------------------------------------------------------------------------------------------------------------------------------------------------------------------------------------------------------------------------------------------------------------|------------------------------------------------------------------------------------------------------|
| Berg 2020 <sup>1</sup>   | Cross-sectional | Metropolitan statistical areas (Atlanta-Sandy Springs-Roswell [Georgia]; Boston-Cambridge-Newton [Massachusetts]; Minneapolis-St. Paul-Bloomington [Minnesota]; Oklahoma City [Oklahoma]; San Diego-Carlsbad [California]; and Seattle-Tacoma-Bellevue [Washington])<br>USA | Census tracts (N=4,307) | Logistic regression (stratified by metropolitan statistical areas) | American Community Survey (2013-2017)<br><br>• Percent non-White (quartiles)<br>• Median household income (quartiles) | Vape shops: online search (i.e., Yelp, Google application programming interfaces) (November-December 2017). Used telephone protocol to verify whether retailers sold vape products and ‘other conventional tobacco products’ | Vape shops (N=459): “sell no other tobacco products beside vaping products” (p. 2) | Presence (vs. absence) of at least one vape shop | No unadjusted effect sizes reported.<br><br>“Logistic regressions indicated that vape shops more likely resided in tracts with lower percentages of youth in Boston, but higher percentages of youth in Atlanta, as well as with lower incomes in Boston and Seattle.” p.1 | 2: Yes<br><br>11: Yes<br>13: No<br><br>18: Yes<br>20: Yes<br><br>NA1: No<br>NA2: Yes<br><br>Total: 5 |
| Boston 2018 <sup>2</sup> | Cross-sectional | Orange County (California)                                                                                                                                                                                                                                                  | Census tracts (N=572)   | Mann-Whitney test (comparing median percentage of sociodemographic | 5-year American Community Survey (2010-2014)                                                                          | For vape stores: Online search methodology (e.g., Google, Yelp,                                                                                                                                                              | N=163<br><br>Vape store                                                            | Presence (vs. absence) of at least one vape shop | ES1:<br>No vape store: 12.7%<br>At least 1 vape store: 15.5%<br>p=0.030                                                                                                                                                                                                    | 2: Yes<br><br>11: Yes<br>13: No                                                                      |

**Notes:** We used a modified Downs and Black checklist to assess the risk of bias (see online repository protocol). We created a risk of bias index (0-7, with higher numbers indicating higher risk of bias) and *a priori* planned to exclude any studies with a score of 4 or higher (none were excluded).

ES=Effect Size

| Author (Year), ID | Study Design | Study Location | Unit of Analysis (N) | Statistical Approach                                                                                                                                                   | Data Source (Year): Area-Level Sociodemographic Variable | Data Source (Year): Tobacco Retailers                                                                                                                                                             | Number and Type of Tobacco Retailers Included | Area-Level Outcome Variable Operationalization   | Unadjusted Effect Sizes                                                 | Risk of Bias                                                   |
|-------------------|--------------|----------------|----------------------|------------------------------------------------------------------------------------------------------------------------------------------------------------------------|----------------------------------------------------------|---------------------------------------------------------------------------------------------------------------------------------------------------------------------------------------------------|-----------------------------------------------|--------------------------------------------------|-------------------------------------------------------------------------|----------------------------------------------------------------|
|                   |              | USA            |                      | characteristics for tracts with no vape store [n=445] vs. those with at least 1 vape store [n=127])                                                                    | Percent Asian race only                                  | Yellowpages) conducted September 2014-March 2015<br><br>Satellite imagery was used to verify retailer location and stratified random sampling of 36 vape stores were visited for ground truthing. |                                               |                                                  |                                                                         | 18: Yes<br>20: Yes<br><br>NA1: Yes<br>NA2: Yes<br><br>Total: 6 |
|                   |              |                |                      | Multivariate zero-inflated Poisson regressions                                                                                                                         | Percent Asian race only                                  |                                                                                                                                                                                                   |                                               | Count of vape stores                             | ES6: IRR: 1.00, 95% CI: 0.99, 1.01                                      |                                                                |
|                   |              |                |                      | Mann-Whitney test (comparing median percentage of sociodemographic characteristics for tracts with no vape store [n=445] vs. those with at least 1 vape store [n=127]) | Percent Hispanic ethnicity                               |                                                                                                                                                                                                   |                                               | Presence (vs. absence) of at least one vape shop | ES2:<br>No vape store: 19.3%<br>At least 1 vape store: 33.7%<br>p=0.001 |                                                                |
|                   |              |                |                      | Multivariate zero-inflated Poisson regressions                                                                                                                         | Percent Hispanic ethnicity                               |                                                                                                                                                                                                   |                                               | Count of vape stores                             | ES7: IRR: 1.00, 95% CI: 0.99, 1.01                                      |                                                                |
|                   |              |                |                      | Mann-Whitney test (comparing median percentage of sociodemographic characteristics for tracts with no vape store [n=445] vs.                                           | Percent foreign-born (born outside the USA)              |                                                                                                                                                                                                   |                                               | Presence (vs. absence) of at least one vape shop | ES3:<br>No vape store: 25.0%<br>At least 1 vape store: 31.6%<br>p=0.004 |                                                                |

**Notes:** We used a modified Downs and Black checklist to assess the risk of bias (see online repository protocol). We created a risk of bias index (0-7, with higher numbers indicating higher risk of bias) and *a priori* planned to exclude any studies with a score of 4 or higher (none were excluded).

ES=Effect Size

| Author (Year), ID | Study Design | Study Location | Unit of Analysis (N) | Statistical Approach                                                                                                                                                   | Data Source (Year): Area-Level Sociodemographic Variable        | Data Source (Year): Tobacco Retailers | Number and Type of Tobacco Retailers Included | Area-Level Outcome Variable Operationalization                               | Unadjusted Effect Sizes                                                                                                                                        | Risk of Bias |
|-------------------|--------------|----------------|----------------------|------------------------------------------------------------------------------------------------------------------------------------------------------------------------|-----------------------------------------------------------------|---------------------------------------|-----------------------------------------------|------------------------------------------------------------------------------|----------------------------------------------------------------------------------------------------------------------------------------------------------------|--------------|
|                   |              |                |                      | those with at least 1 vape store [n=127])                                                                                                                              |                                                                 |                                       |                                               |                                                                              |                                                                                                                                                                |              |
|                   |              |                |                      | Multivariate zero-inflated Poisson regressions                                                                                                                         | Percent foreign-born (born outside the USA)                     |                                       |                                               | Count of vape stores                                                         | ES8: IRR: 1.00, 95% CI: 0.99, 1.01                                                                                                                             |              |
|                   |              |                |                      | Mann-Whitney test (comparing median percentage of sociodemographic characteristics for tracts with no vape store [n=445] vs. those with at least 1 vape store [n=127]) | Percent living below the federal poverty level (tertiled)       |                                       |                                               | Presence (vs. absence) of at least one vape shop                             | ES4:<br>No vape store: 8.8%<br>At least 1 vape store: 12.4%<br>p=0.000                                                                                         |              |
|                   |              |                |                      | Multivariate zero-inflated Poisson regressions                                                                                                                         | Percent living below the federal poverty level (tertiled)       |                                       |                                               | Count of vape stores                                                         | Lowest poverty tertile (ref)<br>ES9: 2 <sup>nd</sup> tertile (IRR 1.69, 95% CI: 1.05, 2.74)<br>ES10: Highest % poverty tertile (IRR: 1.33, 95% CI: 0.82, 2.16) |              |
|                   |              |                |                      | Mann-Whitney test (comparing median percentage of sociodemographic characteristics for tracts with no vape store [n=445] vs. those with at least 1 vape store [n=127]) | Percent with college degree or higher (among those 25 and over) |                                       |                                               | Presence (vs. absence) of at least one vape shop<br><br>Count of vape stores | ES5:<br>No vape store: 25.9%<br>At least 1 vape store: 20.4%<br>p=0.000                                                                                        |              |
|                   |              |                |                      | Multivariate zero-inflated Poisson regressions                                                                                                                         | Percent with college degree or higher (among those 25 and over) |                                       |                                               |                                                                              | ES11: IRR: 1.00, 95% CI: 0.98, 1.02                                                                                                                            |              |

**Notes:** We used a modified Downs and Black checklist to assess the risk of bias (see online repository protocol). We created a risk of bias index (0-7, with higher numbers indicating higher risk of bias) and *a priori* planned to exclude any studies with a score of 4 or higher (none were excluded).

ES=Effect Size

| Author (Year), ID                | Study Design    | Study Location            | Unit of Analysis (N)     | Statistical Approach            | Data Source (Year): Area-Level Sociodemographic Variable                                                                                                                                                                                                                                                                     | Data Source (Year): Tobacco Retailers                                                  | Number and Type of Tobacco Retailers Included | Area-Level Outcome Variable Operationalization | Unadjusted Effect Sizes                                                                                                                                                                                                                                                                                                                                                                                                                                                                                                                                                 | Risk of Bias                                                                                     |
|----------------------------------|-----------------|---------------------------|--------------------------|---------------------------------|------------------------------------------------------------------------------------------------------------------------------------------------------------------------------------------------------------------------------------------------------------------------------------------------------------------------------|----------------------------------------------------------------------------------------|-----------------------------------------------|------------------------------------------------|-------------------------------------------------------------------------------------------------------------------------------------------------------------------------------------------------------------------------------------------------------------------------------------------------------------------------------------------------------------------------------------------------------------------------------------------------------------------------------------------------------------------------------------------------------------------------|--------------------------------------------------------------------------------------------------|
| Chido-Amajuoyi 2020 <sup>3</sup> | Cross-sectional | Austin (Texas)<br><br>USA | Census tract (N=200)     | Logistic regression             | 5-year American Community Survey (2014)<br><br>• Percent distribution of Hispanic<br>• Percent distribution of non-Hispanic Black<br>• Percent distribution of non-Hispanic White<br>• Percent distribution of Other<br>• Percent families living below federal poverty level                                                | Online search methodology: Yelp, Yellow Pages, Google Maps (October 2016-January 2017) | N=52<br><br>Vape shops                        | Presence (vs. absence) of vape shop            | No unadjusted effect sizes reported. “The proportion of vape shop containing census tracts that met the criteria for classification as a “poverty area” (36.5%) was greater than that of vape shop-free census tracts (26.3%). Vape shops were more likely to be present in census tracts classified as poverty areas; however, the odds of vape shop presence declined as the percentage of the non-Hispanic Black population and the percentage of persons aged 10–14 years in census tracts increased.” p.1                                                          | 2: Yes<br><br>11: Yes<br>13: No<br><br>18: Yes<br>20: Yes<br><br>NA1: No<br>NA2: Yes<br>Total: 5 |
| Dai 2017 <sup>4</sup>            | Cross-sectional | USA                       | Census tracts (N=72,758) | Zero inflated negative binomial | American Community Survey (2010-2014)<br>• Percent of Caucasian<br>• Percent of black or African American<br>• Percent of Hispanic<br>• Percent of Asian<br>• Percent of persons with Bachelor’s degree or higher and age >= 25 years<br>• Percent of persons living in poverty<br>• Percent of owner-occupied housing units | Online directories (December 2015): Yelp.com; Yellowpagescom; Guidetovaping.com        | N=9943<br><br>Vape shops                      | Count of vape shops                            | No unadjusted effect sizes reported.<br><br>“In urban areas, higher vape shop density was associated with larger proportions of Hispanics and Asians, adults aged 18–44 years old and higher poverty, while the decrease in vape shop density was associated with larger proportions of population under 18 years old, higher education, larger household size, and a higher percentage of owner occupied housing units. In nonurban areas, higher vape shop density was associated larger proportions of African Americans and Hispanics, smaller household size and a | 2: Yes<br>11: Yes<br>13: Yes<br><br>18: Yes<br>20: Yes<br><br>NA1: No<br>NA2: Yes<br>Total: 6    |

**Notes:** We used a modified Downs and Black checklist to assess the risk of bias (see online repository protocol). We created a risk of bias index (0-7, with higher numbers indicating higher risk of bias) and *a priori* planned to exclude any studies with a score of 4 or higher (none were excluded).

ES=Effect Size

| Author (Year), ID          | Study Design    | Study Location | Unit of Analysis (N)  | Statistical Approach                                                                                                                                                                   | Data Source (Year): Area-Level Sociodemographic Variable                  | Data Source (Year): Tobacco Retailers                                                                                                                                                                                               | Number and Type of Tobacco Retailers Included                                                                                                       | Area-Level Outcome Variable Operationalization | Unadjusted Effect Sizes                                                                                       | Risk of Bias                                                                                      |
|----------------------------|-----------------|----------------|-----------------------|----------------------------------------------------------------------------------------------------------------------------------------------------------------------------------------|---------------------------------------------------------------------------|-------------------------------------------------------------------------------------------------------------------------------------------------------------------------------------------------------------------------------------|-----------------------------------------------------------------------------------------------------------------------------------------------------|------------------------------------------------|---------------------------------------------------------------------------------------------------------------|---------------------------------------------------------------------------------------------------|
|                            |                 |                |                       |                                                                                                                                                                                        |                                                                           |                                                                                                                                                                                                                                     |                                                                                                                                                     |                                                | lower percentage of owner occupied housing units.” p.1338                                                     |                                                                                                   |
| Giovenco 2016 <sup>5</sup> | Cross-sectional | New Jersey USA | Census tract (N=1989) | Mann-Whitney U test comparing mean (μ) sociodemographic characteristics for trats with at least one vape shop present (n=125) as compared to tracts with no vape shop present (n=1864) | American Community Survey 5-year (2013)<br><br>Percent non-Hispanic black | Yelp; online search protocol (i.e. systematic searches of Google, Google Maps, Facebook, and vape shop directories on vaping websites), and each store was contacted via telephone to verify current operation (June and July 2015) | N=130<br><br>All identified vape shops (i.e., “retailers that sells vaping products and its accessories but does not sell tobacco products” p. 124) | Presence (vs. absence) of vape shop            | ES1:<br>Vape shop present: μ (SD): 7.9 (11.2)<br><br>No vape shop present: μ (SD): 15.6 (23.1)<br><br>p<0.01  | 2: Yes<br><br>11: Yes<br>13: No<br><br>18: Yes<br>20: Yes<br><br>NA1: Yes<br>NA2: Yes<br>Total: 6 |
|                            |                 |                |                       |                                                                                                                                                                                        | Percent Hispanic                                                          |                                                                                                                                                                                                                                     |                                                                                                                                                     | Presence (vs. absence) of vape shop            | ES2:<br>Vape shop present: μ (SD): 16.3 (16.1)<br><br>No vape shop present: μ (SD): 18.2 (20.6)<br><br>p=0.63 |                                                                                                   |
|                            |                 |                |                       |                                                                                                                                                                                        | Percent non-Hispanic white                                                |                                                                                                                                                                                                                                     |                                                                                                                                                     | Presence (vs. absence) of vape shop            | ES3:<br>Vape shop present: μ (SD): 65.6 (24.6)<br><br>No vape shop present: μ (SD): 57.4 (30.9)<br><br>p=0.01 |                                                                                                   |
|                            |                 |                |                       |                                                                                                                                                                                        | Percent with less than high school education                              |                                                                                                                                                                                                                                     |                                                                                                                                                     | Presence (vs. absence) of vape shop            | ES4:<br>Vape shop present: μ (SD): 11.6 (8.1)<br><br>No vape shop present:                                    |                                                                                                   |

**Notes:** We used a modified Downs and Black checklist to assess the risk of bias (see online repository protocol). We created a risk of bias index (0-7, with higher numbers indicating higher risk of bias) and *a priori* planned to exclude any studies with a score of 4 or higher (none were excluded).

ES=Effect Size

| Author (Year), ID        | Study Design    | Study Location                                              | Unit of Analysis (N) | Statistical Approach                                              | Data Source (Year): Area-Level Sociodemographic Variable                                                                                                                                                                                                                                                                                    | Data Source (Year): Tobacco Retailers                                                                                                                                                                                                                                                                        | Number and Type of Tobacco Retailers Included                                     | Area-Level Outcome Variable Operationalization | Unadjusted Effect Sizes                                                                                                                                                                                                                                                | Risk of Bias                                                                                     |
|--------------------------|-----------------|-------------------------------------------------------------|----------------------|-------------------------------------------------------------------|---------------------------------------------------------------------------------------------------------------------------------------------------------------------------------------------------------------------------------------------------------------------------------------------------------------------------------------------|--------------------------------------------------------------------------------------------------------------------------------------------------------------------------------------------------------------------------------------------------------------------------------------------------------------|-----------------------------------------------------------------------------------|------------------------------------------------|------------------------------------------------------------------------------------------------------------------------------------------------------------------------------------------------------------------------------------------------------------------------|--------------------------------------------------------------------------------------------------|
|                          |                 |                                                             |                      |                                                                   |                                                                                                                                                                                                                                                                                                                                             |                                                                                                                                                                                                                                                                                                              |                                                                                   |                                                | $\mu$ (SD): 12.6 (10.4)<br>p=0.79                                                                                                                                                                                                                                      |                                                                                                  |
|                          |                 |                                                             |                      |                                                                   | Median income                                                                                                                                                                                                                                                                                                                               |                                                                                                                                                                                                                                                                                                              |                                                                                   | Presence (vs. absence) of vape shop            | ES5:<br>Vape shop present:<br>$\mu$ (SD): \$35,207 (\$10,059)<br><br>No vape shop present:<br>$\mu$ (SD): \$36,142 (\$13,901)<br><br>p=0.88                                                                                                                            |                                                                                                  |
|                          |                 |                                                             |                      |                                                                   | Percent without health insurance                                                                                                                                                                                                                                                                                                            |                                                                                                                                                                                                                                                                                                              |                                                                                   | Presence (vs. absence) of vape shop            | ES6:<br>Vape shop present:<br>$\mu$ (SD): 13.2 (8.1)<br><br>No vape shop present:<br>$\mu$ (SD): 13.1 (9.7)<br><br>p=0.22                                                                                                                                              |                                                                                                  |
| Sawdey 2017 <sup>6</sup> | Cross-sectional | Richmond, Virginia Metropolitan Statistical Area<br><br>USA | Census tract (N=288) | Analysis of Variance (ANOVA) with Bonferroni pairwise comparisons | American Community Survey (2014)<br><br>“Socioeconomic status index created using principal components analysis from the following variables: percent unemployed, percent below poverty threshold, percent less than high school education, percent college education or higher, median household value, median household income”(variables | “Websites of popular e-cigarette brands” (n=6) ”E-cigarette brand websites were used as a proxy for where tobacco products are sold as Virginia does not license retailers” (p. 124); Yelp.com & Google.com “were used to capture non-traditional tobacco/e-cigarette retailers such as vape shops” (p. 124) | N=984<br><br>Tobacco retailers selling e-cigarette products, including vape shops | Count of tobacco retailers                     | ES1:<br>Q1 (lowest): 3.7<br>Q2: 3.7<br>Q3: 3.8<br>Q4 (highest): 2.4<br><br>p-values not specified: Q4 “was significantly lower...versus other quartiles” (p. 134)<br><br>This paper additionally reports regression analyses that control for census tract population. | 2: Yes<br><br>11: Yes<br>13: No<br><br>18: Yes<br>20: Yes<br><br>NA1: No<br>NA2: Yes<br>Total: 5 |

**Notes:** We used a modified Downs and Black checklist to assess the risk of bias (see online repository protocol). We created a risk of bias index (0-7, with higher numbers indicating higher risk of bias) and *a priori* planned to exclude any studies with a score of 4 or higher (none were excluded).

ES=Effect Size

| Author (Year), ID | Study Design | Study Location | Unit of Analysis (N) | Statistical Approach | Data Source (Year): Area-Level Sociodemographic Variable                                                                                                                                                                                                                                                                                               | Data Source (Year): Tobacco Retailers | Number and Type of Tobacco Retailers Included | Area-Level Outcome Variable Operationalization          | Unadjusted Effect Sizes                                                                                                                                                                                                                                                     | Risk of Bias |
|-------------------|--------------|----------------|----------------------|----------------------|--------------------------------------------------------------------------------------------------------------------------------------------------------------------------------------------------------------------------------------------------------------------------------------------------------------------------------------------------------|---------------------------------------|-----------------------------------------------|---------------------------------------------------------|-----------------------------------------------------------------------------------------------------------------------------------------------------------------------------------------------------------------------------------------------------------------------------|--------------|
|                   |              |                |                      |                      | standardized and factor scores quartiled) (p. 126)                                                                                                                                                                                                                                                                                                     |                                       |                                               |                                                         |                                                                                                                                                                                                                                                                             |              |
|                   |              |                |                      |                      | “Socioeconomic status index created using principal components analysis from the following variables: percent unemployed, percent below poverty threshold, percent less than high school education, percent college education or higher, median household value, median household income”(variables standardized and factor scores quartiled) (p. 126) |                                       |                                               | Count of tobacco retailers per 10 kilometers of roadway | ES2:<br>Q1 (lowest): 0.26<br>Q2: 0.16<br>Q3: 0.15<br>Q4 (highest): 0.16<br><br>p-values not specified: Q1 “was significantly higher...versus other quartiles” (p. 134)<br><br>This paper additionally reports regression analyses that control for census tract population. |              |
|                   |              |                |                      |                      | Race diversity index (created): “Majority White”: tracts >60% White; “Majority non-White”: >60% Non-white; “Racially diverse”: less than 60% of both (p. 126)                                                                                                                                                                                          |                                       |                                               | Count of tobacco retailers                              | ES3:<br>White: 3.5<br>Non-white: 3.4<br>Diverse: 3.5<br><br>p-values not specified: “there was a non-significant difference” (p. 133)                                                                                                                                       |              |
|                   |              |                |                      |                      | Race diversity index (created): “Majority White”: tracts >60% White; “Majority non-White”: >60% Non-white; “Racially diverse”: less than 60% of both (p. 126)                                                                                                                                                                                          |                                       |                                               | Count of tobacco retailers per 10 kilometers of roadway | ES3:<br>White: 0.15<br>Non-white: 0.19<br>Diverse: 0.26<br><br>p-values not specified and unclear which pairwise comparisons were done: “Diverse tracts...significantly                                                                                                     |              |

**Notes:** We used a modified Downs and Black checklist to assess the risk of bias (see online repository protocol). We created a risk of bias index (0-7, with higher numbers indicating higher risk of bias) and *a priori* planned to exclude any studies with a score of 4 or higher (none were excluded).

ES=Effect Size

| Author (Year), ID | Study Design | Study Location | Unit of Analysis (N) | Statistical Approach | Data Source (Year): Area-Level Sociodemographic Variable | Data Source (Year): Tobacco Retailers | Number and Type of Tobacco Retailers Included | Area-Level Outcome Variable Operationalization | Unadjusted Effect Sizes                              | Risk of Bias |
|-------------------|--------------|----------------|----------------------|----------------------|----------------------------------------------------------|---------------------------------------|-----------------------------------------------|------------------------------------------------|------------------------------------------------------|--------------|
|                   |              |                |                      |                      |                                                          |                                       |                                               |                                                | higher than white...or non-white tracts...” (p. 133) |              |

REFERENCES

1. Berg CJ, Schleicher NC, Johnson TO, et al. Vape shop identification, density and place characteristics in six metropolitan areas across the US. *Preventive Medicine Reports*.2020;19:101137. doi:10.1016/j.pmedr.2020.101137

2. Bostean G, Sanchez L, Lippert AM. Sociodemographic disparities in e-cigarette retail environment: Vape stores and census tract characteristics in Orange County, CA. *Health & Place*.2018;50:65-72. doi:10.1016/j.healthplace.2017.12.004

3. Chido-Amajuoyi OG, Ozigbu CE, Zhang K. School proximity and census tract correlates of e-cigarette specialty retail outlets (vape shops) in central Texas. *Preventive Medicine Reports*.2020;18:101079. doi:10.1016/j.pmedr.2020.101079

4. Dai H, Hao J, Catley D. Vape shop density and socio-demographic disparities: a US census tract analysis. *Nicotine & Tobacco Research*.2017;19(11):1338-1344. doi:10.1093/ntr/ntx063

5. Giovenco DP, Duncan DT, Coups EJ, Lewis MJ, Delnevo CD. Census tract correlates of vape shop locations in New Jersey. *Health & Place*.2016;40:123-128. doi:10.1016/j.healthplace.2016.05.008

6. Sawdey MD. *Socioecological aspects of tobacco use in college populations*. Virginia Commonwealth University; 2017. <https://scholarscompass.vcu.edu/etd/4805/>

**Notes:** We used a modified Downs and Black checklist to assess the risk of bias (see online repository protocol). We created a risk of bias index (0-7, with higher numbers indicating higher risk of bias) and *a priori* planned to exclude any studies with a score of 4 or higher (none were excluded).

ES=Effect Size
